# Supplementary material for: Users’ needs for a digital smoking cessation application and how to address them: A mixed-methods study
Source: PubMed Central journal article supplement (PMC9394512; doi:10.7717/peerj.13824), 2022-08-19
Supplement: peerj-10-13824-s003.pdf [file peerj-10-13824-s003.pdf]

Table S3: **Links to the videos of the interaction scenarios.** We provide links to both the male and the female version.

| Scenario                              | Topic                                                        | Link to Video                                                                                                                                                   |
|---------------------------------------|--------------------------------------------------------------|-----------------------------------------------------------------------------------------------------------------------------------------------------------------|
| INTERACTION WITH VIRTUAL COACH        |                                                              |                                                                                                                                                                 |
| 1                                     | Follow physical activity program while quitting smoking      | Female: <a href="https://youtu.be/_01muAuJbfU">https://youtu.be/_01muAuJbfU</a> , Male: <a href="https://youtu.be/gHZZKX6dQMo">https://youtu.be/gHZZKX6dQMo</a> |
| 2                                     | Plan for smoking HRSs in the mornings                        | Female: <a href="https://youtu.be/DyZPA781nn4">https://youtu.be/DyZPA781nn4</a> , Male: <a href="https://youtu.be/zpWy28vtSzM">https://youtu.be/zpWy28vtSzM</a> |
| 3                                     | Plan for physical activity HRSs on Sundays                   | Female: <a href="https://youtu.be/JFz17RAXDOU">https://youtu.be/JFz17RAXDOU</a> , Male: <a href="https://youtu.be/cA78pzMoFuo">https://youtu.be/cA78pzMoFuo</a> |
| 4                                     | Help button for smoking HRSs                                 | Female: <a href="https://youtu.be/aLrCZyFvs1o">https://youtu.be/aLrCZyFvs1o</a> , Male: <a href="https://youtu.be/sLBF2BuMv80">https://youtu.be/sLBF2BuMv80</a> |
| 5                                     | Help button for physical activity HRSs                       | Female: <a href="https://youtu.be/5j1a6Nlhs8s">https://youtu.be/5j1a6Nlhs8s</a> , Male: <a href="https://youtu.be/HZLtG4LfvIs">https://youtu.be/HZLtG4LfvIs</a> |
| 6                                     | Reflect on smoking HRSs in the evenings                      | Female: <a href="https://youtu.be/dkUkzneVDyM">https://youtu.be/dkUkzneVDyM</a> , Male: <a href="https://youtu.be/Raq7Qyvh45A">https://youtu.be/Raq7Qyvh45A</a> |
| 7                                     | Reflect on physical activity HRSs on Sundays                 | Female: <a href="https://youtu.be/nczb97qrg0g">https://youtu.be/nczb97qrg0g</a> , Male: <a href="https://youtu.be/FXC7oZLLzvQ">https://youtu.be/FXC7oZLLzvQ</a> |
| 8                                     | Discuss repeated failure of reaching physical activity goals | Female: <a href="https://youtu.be/UHds1aEB1GQ">https://youtu.be/UHds1aEB1GQ</a> , Male: <a href="https://youtu.be/ST08tEGpWXI">https://youtu.be/ST08tEGpWXI</a> |
| 9                                     | Receive motivational messages                                | Female: <a href="https://youtu.be/eV6TLfa-hIs">https://youtu.be/eV6TLfa-hIs</a> , Male: <a href="https://youtu.be/IGKRjhK40Cs">https://youtu.be/IGKRjhK40Cs</a> |
| INTERACTION WITH SOCIAL ENVIRONMENT   |                                                              |                                                                                                                                                                 |
| 10                                    | Tell SE about quit attempt                                   | Female: <a href="https://youtu.be/Soz1TeF0EiY">https://youtu.be/Soz1TeF0EiY</a> , Male: <a href="https://youtu.be/wDxMd-vwJgM">https://youtu.be/wDxMd-vwJgM</a> |
| 11                                    | Discuss with an SO how they can support the quit attempt     | Female: <a href="https://youtu.be/UPxHprogZc0">https://youtu.be/UPxHprogZc0</a> , Male: <a href="https://youtu.be/ZbopPvhQJWw">https://youtu.be/ZbopPvhQJWw</a> |
| INTERACTION WITH GENERAL PRACTITIONER |                                                              |                                                                                                                                                                 |
| 12                                    | Consult GP at start of quit attempt                          | Female: <a href="https://youtu.be/1DTeHgBA71w">https://youtu.be/1DTeHgBA71w</a> , Male: <a href="https://youtu.be/2WJQDn251DM">https://youtu.be/2WJQDn251DM</a> |
| 13                                    | Consult GP in case of smoking relapse                        | Female: <a href="https://youtu.be/R1-xdeRexUw">https://youtu.be/R1-xdeRexUw</a> , Male: <a href="https://youtu.be/w5W1DGHKtn4">https://youtu.be/w5W1DGHKtn4</a> |

Abbreviations: HRS, High risk situation; SE, Social environment; SO, Significant other; GP, General practitioner.
