# Supplementary material for: Users’ needs for a digital smoking cessation application and how to address them: A mixed-methods study
Source: PeerJ journal article supplement (doi:10.7717/peerj.13824), 2022-08-19
Supplement: S2_Table.pdf [file S2_Table.pdf]

Table S2: **Interaction scenarios.** Some scenarios about similar interactions are grouped together to facilitate their analysis.

| Scenario                              | Topic                                                        | Scenario Group                  |
|---------------------------------------|--------------------------------------------------------------|---------------------------------|
| INTERACTION WITH VIRTUAL COACH        |                                                              |                                 |
| 1                                     | Follow physical activity program while quitting smoking      | Follow PA program               |
| 2                                     | Plan for smoking HRSs in the mornings                        | Regular HRS planning/reflection |
| 3                                     | Plan for physical activity HRSs on Sundays                   | Regular HRS planning/reflection |
| 4                                     | Help button for smoking HRSs                                 | Help button for HRS             |
| 5                                     | Help button for physical activity HRSs                       | Help button for HRS             |
| 6                                     | Reflect on smoking HRSs in the evenings                      | Regular HRS planning/reflection |
| 7                                     | Reflect on physical activity HRSs on Sundays                 | Regular HRS planning/reflection |
| 8                                     | Discuss repeated failure of reaching physical activity goals | Discuss repeated failure PA     |
| 9                                     | Receive motivational messages                                | Receive motivational messages   |
| INTERACTION WITH SOCIAL ENVIRONMENT   |                                                              |                                 |
| 10                                    | Tell SE about quit attempt                                   | Involve SE                      |
| 11                                    | Discuss with an SO how they can support the quit attempt     | Involve SE                      |
| INTERACTION WITH GENERAL PRACTITIONER |                                                              |                                 |
| 12                                    | Consult GP at start of quit attempt                          | Involve GP                      |
| 13                                    | Consult GP in case of smoking relapse                        | Involve GP                      |

Abbreviations: PA, Physical activity; HRS, High risk situation; SE, Social environment; SO, Significant other; GP, General practitioner.
