# Supplementary material for: Users’ needs for a digital smoking cessation application and how to address them: A mixed-methods study
Source: PeerJ journal article supplement (doi:10.7717/peerj.13824), 2022-08-19
Supplement: S5_Table.pdf [file S5_Table.pdf]

Table S5: **Question and scale endpoints for each interaction scenario.**

| Scenario                              | Topic                                                        | Question                                                                                                          | Scale Endpoints                                       |
|---------------------------------------|--------------------------------------------------------------|-------------------------------------------------------------------------------------------------------------------|-------------------------------------------------------|
| INTERACTION WITH VIRTUAL COACH        |                                                              |                                                                                                                   |                                                       |
| 1                                     | Follow physical activity program while quitting smoking      | If this were you, would you follow this advice and also follow the program for becoming more physically active?   | -5 ("Definitely no"), 5 ("Definitely yes")            |
| 2                                     | Plan for smoking HRSs in the mornings                        | If this were you, would you make such a plan with your virtual coach in the morning?                              | -5 ("Definitely no"), 5 ("Definitely yes")            |
| 3                                     | Plan for physical activity HRSs on Sundays                   | If this was you, would you make such a plan with your virtual coach on Sundays?                                   | -5 ("Definitely no"), 5 ("Definitely yes")            |
| 4                                     | Help button for smoking HRSs                                 | If this was you, would you press the help button when you have a craving?                                         | -5 ("Definitely no"), 5 ("Definitely yes")            |
| 5                                     | Help button for physical activity HRSs                       | If this was you, would you press the help button in this situation?                                               | -5 ("Definitely no"), 5 ("Definitely yes")            |
| 6                                     | Reflect on smoking HRSs in the evenings                      | If this was you, would you follow this advice and consult your virtual coach in the evening?                      | -5 ("Definitely no"), 5 ("Definitely yes")            |
| 7                                     | Reflect on physical activity HRSs on Sundays                 | If this was you, would you consult your virtual coach on Sundays?                                                 | -5 ("Definitely no"), 5 ("Definitely yes")            |
| 8                                     | Discuss repeated failure of reaching physical activity goals | If this was you, would you take this advice and consult your virtual coach?                                       | -5 ("Definitely no"), 5 ("Definitely yes")            |
| 9                                     | Receive motivational messages                                | If this were you, what do you think would be the impact of such a motivational message on you doing the activity? | -5 ("Definitely negative"), 5 ("Definitely positive") |
| INTERACTION WITH SOCIAL ENVIRONMENT   |                                                              |                                                                                                                   |                                                       |
| 10                                    | Tell SE about quit attempt                                   | If this was you, would you follow up on this advice and tell your social environment about your quit attempt?     | -5 ("Definitely no"), 5 ("Definitely yes")            |
| 11                                    | Discuss with an SO how they can support the quit attempt     | If this were you, would you follow up on this advice and reach out to a significant other for additional support? | -5 ("Definitely no"), 5 ("Definitely yes")            |
| INTERACTION WITH GENERAL PRACTITIONER |                                                              |                                                                                                                   |                                                       |
| 12                                    | Consult GP at start of quit attempt                          | If this was you, would you follow up on this advice and contact your GP?                                          | -5 ("Definitely no"), 5 ("Definitely yes")            |
| 13                                    | Consult GP in case of smoking relapse                        | If this was you, would you contact your GP if your app advises you to do so?                                      | -5 ("Definitely no"), 5 ("Definitely yes")            |

Abbreviations: HRS, High risk situation; SE, Social environment; SO, Significant other; GP, General practitioner.
