# Supplementary material for: Users’ needs for a digital smoking cessation application and how to address them: A mixed-methods study
Source: PeerJ journal article supplement (doi:10.7717/peerj.13824), 2022-08-19
Supplement: S7_Figure.pdf [file S7_Figure.pdf]

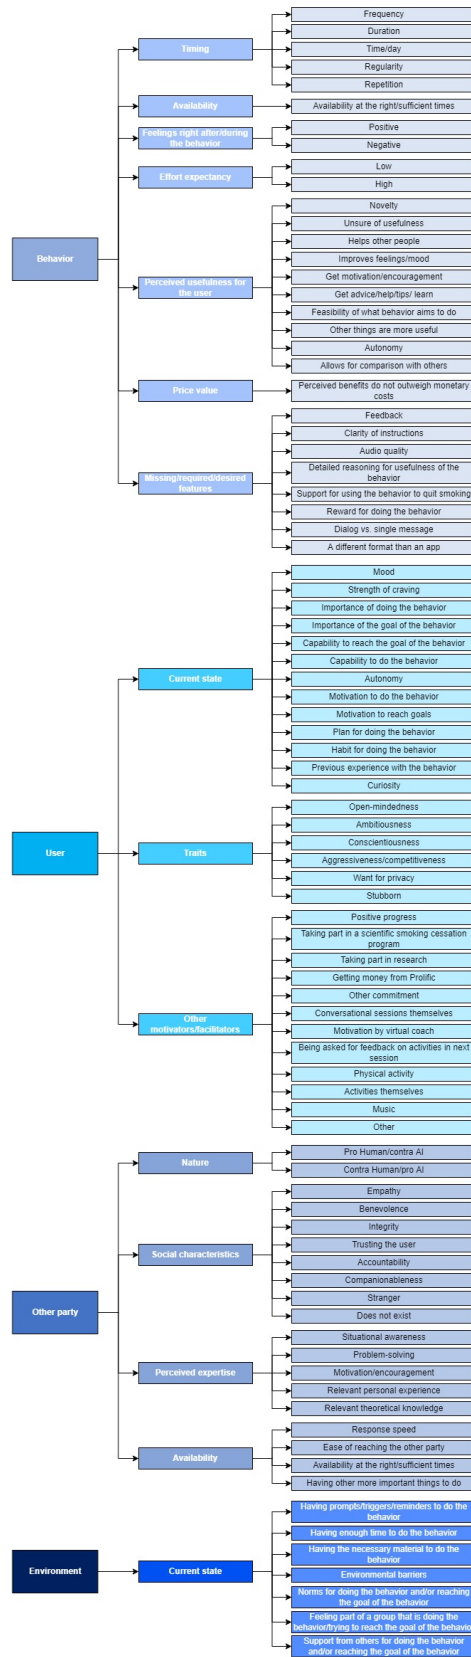

Cohen's kappa: 0.53  
Brennan-Prediger kappa: 0.62

Cohen's kappa: 0.56  
Brennan-Prediger kappa: 0.67

Cohen's kappa: 0.41  
Brennan-Prediger kappa: 0.67

Figure S7: **Coding scheme.** The coding scheme consists of 4 codes at the highest level, 15 codes at the second level, and 86 codes at the third level. We show the reliability for each coding level.
