# Supplementary material for: Users’ needs for a digital smoking cessation application and how to address them: A mixed-methods study
Source: PeerJ journal article supplement (doi:10.7717/peerj.13824), 2022-08-19
Supplement: S8_Figure.pdf [file S8_Figure.pdf]

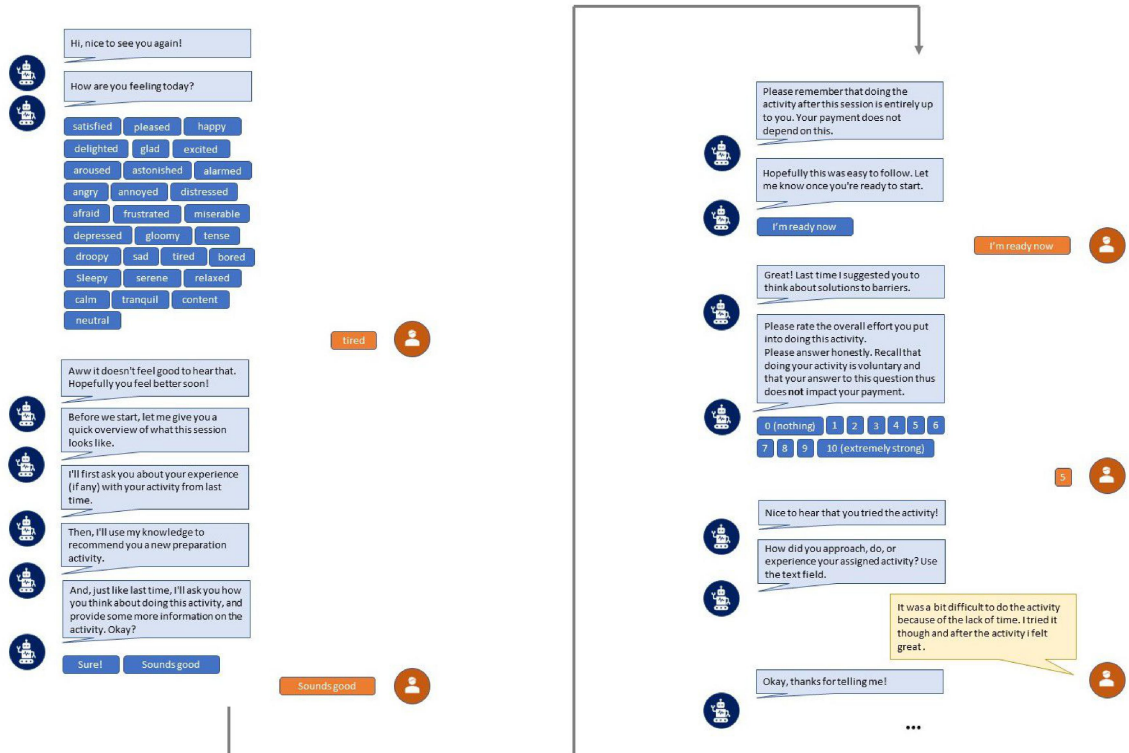

Figure S8: **Conversation example.** The example shows the start of the second conversational session with Sam, including responses given by a participant.
