# Supplementary material for: Users’ needs for a digital smoking cessation application and how to address them: A mixed-methods study
Source: PeerJ journal article supplement (doi:10.7717/peerj.13824), 2022-08-19
Supplement: S9_Figure.pdf [file S9_Figure.pdf]

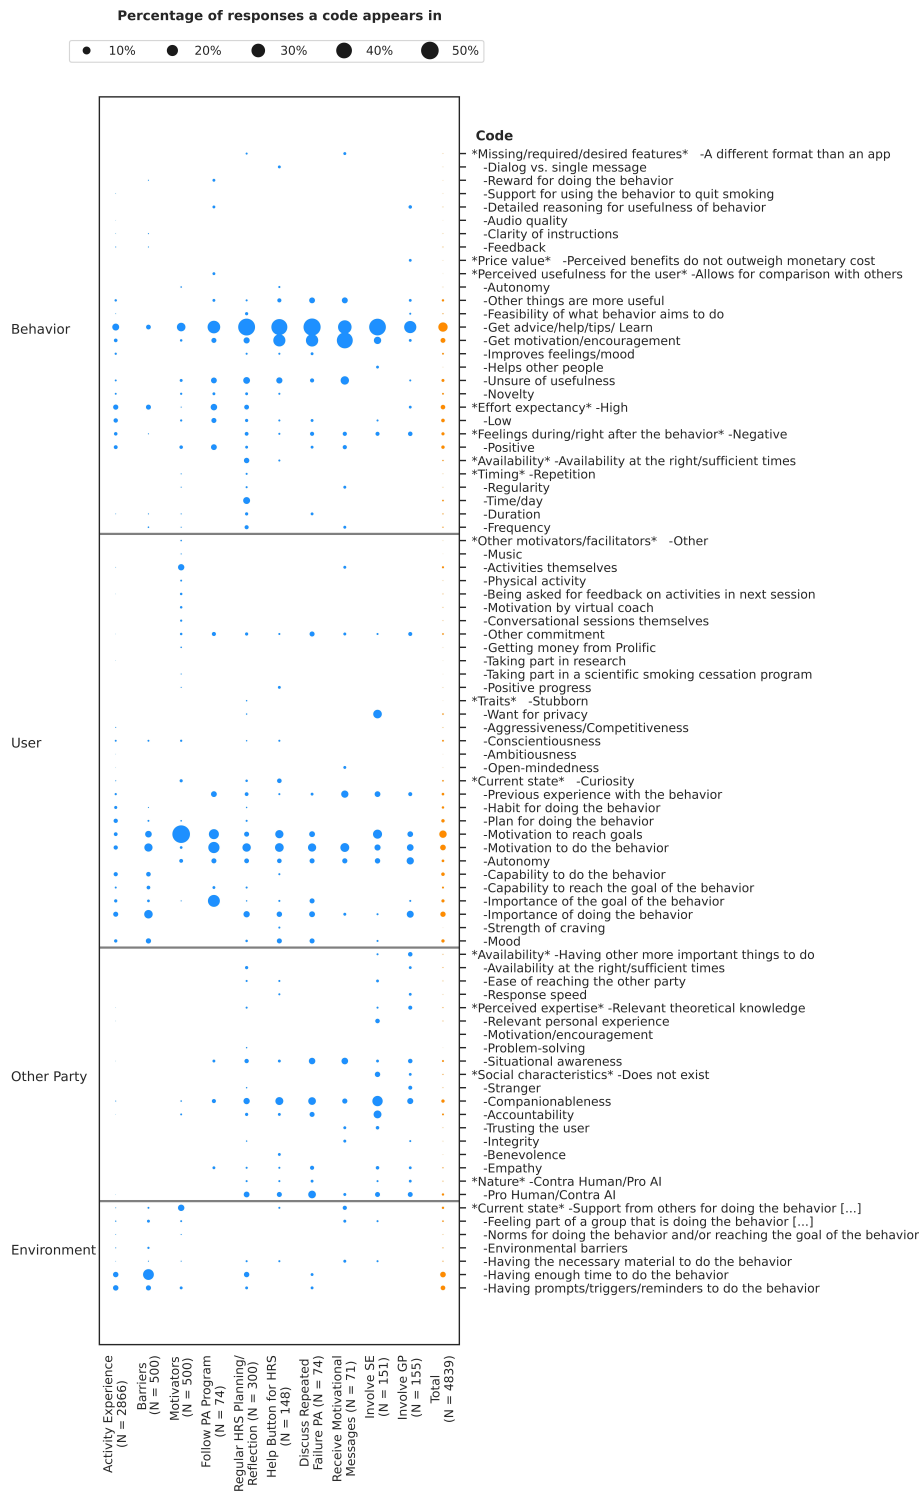

Figure S9: Percentage of times each code from the coding scheme appears in each response type as well as across all response types together. The response types are the activity experiences, barriers, motivators, and the groups of interaction scenarios. *N* denotes the number of responses.
