# Supplementary material for: Users’ needs for a digital smoking cessation application and how to address them: A mixed-methods study
Source: PeerJ journal article supplement (doi:10.7717/peerj.13824), 2022-08-19
Supplement: Table_S6_staff_KT.pdf [file Table_S6_staff_KT.pdf]

Table S6: **Participant characteristics.** Characteristics of the 671 participants with at least one valid free-text response.

| Characteristic                                  | Value        |
|-------------------------------------------------|--------------|
| AGE                                             |              |
| - 18 – 30, n (%)                                | 315 (46.94%) |
| - 31 – 40, n (%)                                | 168 (25.04%) |
| - 41 – 50, n (%)                                | 100 (14.90%) |
| - 51 – 60, n (%)                                | 70 (10.43%)  |
| - 61 – 74, n (%)                                | 18 (2.68%)   |
| GENDER                                          |              |
| - Female, n (%)                                 | 349 (52.01%) |
| - Male, n (%)                                   | 310 (46.20%) |
| - Other, n (%)                                  | 11 ( 1.64%)  |
| - <i>No data</i> , n (%)                        | 1 ( 0.15%)   |
| HIGHEST COMPLETED EDUCATION LEVEL               |              |
| - No formal qualifications, n (%)               | 5 ( 0.75%)   |
| - Secondary education (e.g. GED/GCSE), n (%)    | 76 (11.33%)  |
| - High school diploma/A-levels, n (%)           | 170 (25.34%) |
| - Technical/community college, n (%)            | 103 (15.35%) |
| - Undergraduate degree (BA/BSc/other), n (%)    | 211 (31.45%) |
| - Graduate degree (MA/MSc/MPhil/other), n (%)   | 95 (14.16%)  |
| - Doctorate degree (PhD/other), n (%)           | 7 ( 1.04%)   |
| - <i>No data</i> , n (%)                        | 4 ( 0.60%)   |
| PREVIOUS QUIT ATTEMPT OF AT LEAST 24 HOURS      |              |
| - Yes, n (%)                                    | 528 (78.69%) |
| - No, n (%)                                     | 143 (21.31%) |
| SMOKING FREQUENCY                               |              |
| - Once a day, n (%)                             | 36 ( 5.37%)  |
| - 2 – 5 times a day, n (%)                      | 165 (24.59%) |
| - 6 – 10 times a day, n (%)                     | 213 (31.74%) |
| - 11 – 19 times a day, n (%)                    | 190 (28.32%) |
| - More than 20 times a day, n (%)               | 64 ( 9.54%)  |
| - <i>No data</i> , n (%)                        | 3 ( 0.45%)   |
| TTM-STAGE FOR BECOMING PHYSICALLY ACTIVE        |              |
| - Precontemplation, n (%)                       | 44 ( 6.56%)  |
| - Contemplation, n (%)                          | 188 (28.02%) |
| - Preparation, n (%)                            | 159 (23.70%) |
| - Action, n (%)                                 | 83 (12.37%)  |
| - Maintenance, n (%)                            | 197 (29.36%) |
| TTM-STAGE FOR QUITTING SMOKING                  |              |
| - Contemplation, n (%)                          | 577 (85.99%) |
| - Preparation, n (%)                            | 94 (14.01%)  |
| WEEKLY EXERCISE AMOUNT                          |              |
| - Never (0 – 60 minutes per week), n (%)        | 174 (25.93%) |
| - Sometimes (60 – 150 minutes per week), n (%)  | 322 (47.99%) |
| - Often (more than 150 minutes per week), n (%) | 170 (25.34%) |
| - <i>No data</i> , n (%)                        | 5 ( 0.75%)   |

Abbreviations: GED, General educational development; GCSE, General certificate of secondary education; BA, Bachelor of Arts; BSc, Bachelor of Science; MA, Master of Arts; MSc, Master of Science; MPhil, Master of Philosophy; PhD, Doctor of Philosophy; TTM, Transtheoretical model.
